# Supplementary material for: Exploring the amplified role of HCHO in the formation of HMS and O 3 during the co-occurring PM 2.5 and O 3 pollution in a coastal city of southeast China
Source: Copernicus journal article supplement (doi:10.5194/acp-23-10795-2023), 2023-09-28
Supplement: Supplementary file 1 [file acp-23-10795-2023-supplement.pdf]

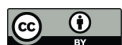

*Supplement of*

## **Exploring the amplified role of HCHO in the formation of HMS and O<sub>3</sub> during the co-occurring PM<sub>2.5</sub> and O<sub>3</sub> pollution in a coastal city of south-east China**

**Youwei Hong et al.**

*Correspondence to:* Youwei Hong (ywhong@iue.ac.cn) and Likun Xue (xuelikun@sdu.edu.cn)

The copyright of individual parts of the supplement might differ from the article licence.

## 31 **The Observation-based model (OBM)**

32

33 A chemical box model, as one of the important methods for analyzing atmospheric  
34 chemical processes, was run based on the platform of the Framework for 0-Dimensional  
35 Atmospheric Modeling (F0AM), which has broad application potential in deeply  
36 exploring atmospheric observation data and comprehensively understanding the  
37 regional atmospheric pollution. About the chemical mechanism, the F0AM  
38 incorporating the latest chemical mechanism version of MCM-v3.3.1 (MCM,  
39 <http://mcm.leeds.ac.uk/MCM/>, last access: 13 May 2022) was applied to simulate the  
40 detailed photochemical processes and quantify the reaction rates of HCHO mechanism,  
41 and the MCM mechanism introduced 142 VOCs and about 20,000 chemical reactions.

42 About the uncertainties of the model simulation results, the index of agreement (IOA)  
43 was used to judge the reliability of the model simulation results, as follows:

44 
$$IOA = 1 - \frac{\sum_{i=1}^n (O_i - S_i)^2}{\sum_{i=1}^n (|O_i - \bar{O}| + |S_i - \bar{O}|)^2}$$

45 where  $S_i$  is simulated value,  $O_i$  represents observed value,  $\bar{O}$  is the average observed  
46 values, and  $n$  is the sample number. The IOA range is 0-1, and the higher the IOA value  
47 is, the better agreement between simulated and observed values is. In this study, the  
48 simulation results (the IOA is approximately 0.80) are reasonable, and the performance  
49 of the OBM-MCM model was acceptable.

50

51

## 52 **Uncertainty evaluation of OBM analysis:**

53

54 Since aqueous HCHO was not available during the observation, which was the key  
55 chemical components influencing the subsequent HMS modeling, we established the  
56 aqueous HCHO concentrations by the mass transfer processed between the gas- and  
57 particle- phase. Among this processes, the uncertainties were introduced somehow by  
58 the Henry's law constant adopted in the model. We conducted a sensitivity test with 2  
59 folds of current used Henry's law constant of HCHO, with a value of  $6 \times 10^7 \text{ M atm}^{-1}$ .  
60 As shown in Fig S0, the modeled aqueous HCHO as well as HMS concentrations  
61 increased with the increase of Henry's law constant in the sensitivity case, with increase  
62 of 0.01 and  $0.13 \mu\text{g m}^{-3}$  for aqueous HCHO and HMS, respectively. It is quite  
63 reasonable considering the increased solubility of HCHO. On the other hand, the  
64 modeled HCHO and HMS were still exhibited higher concentrations during the  
65 pollution episodes (EP1 and EP2), of which higher precursors and favorable aerosol  
66 properties enhanced the heterogeneous processes. Therefore, the impacts of HCHO  
67 Henry's law constant approximations on the conclusions are supposed to be minor.

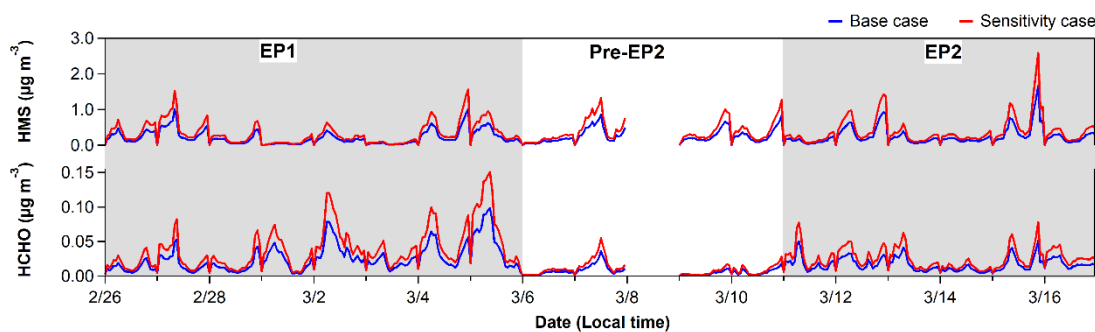

68  
 69 **Fig S1. Time series of the modeled aqueous HCHO and HMS concentrations with the model**  
 70 **used Henry's law constant of HCHO (referred as base case, the blue line) and 2 folds of the**  
 71 **model used Henry's law constant of HCHO (referred as sensitivity case, the red line),**  
 72 **respectively.**  
 73

74 In the atmosphere, gaseous HCHO with high Henry's law constant can partition into  
 75 aerosol or cloud/fog water, then the aqueous HCHO can react with H<sub>2</sub>O<sub>2</sub> to form HMHP,  
 76 with an upper bound forward rate constant of 100 ( $\pm 35$ ) M<sup>-1</sup> s<sup>-1</sup> and reverse rate constant of  
 77 0.6 ( $\pm 0.2$ ) s<sup>-1</sup> (Dovrou et al., 2022). In the gas phase, HMHP is mainly formed by the  
 78 hydration of CH<sub>2</sub>OO Criegee radicals and then can partition into aerosol water, which have  
 79 the potential to oxidize SO<sub>2</sub>(aq) to form sulfate. From the perspective of contributions of  
 80 HMHP paths to sulfate formation, the researcher revealed that the HCHO-catalysis path  
 81 (HCHO + H<sub>2</sub>O<sub>2</sub>) under fast equilibrium is more significant than HMHP-direct path  
 82 (hydration of CH<sub>2</sub>OO in the gas-phase) to global sulfate, so HCHO-catalysis path is  
 83 significant for HMHP production. So, in the future, we will carry out the observation of  
 84 H<sub>2</sub>O<sub>2</sub> for further evaluate the effects of HCHO + H<sub>2</sub>O<sub>2</sub> reaction on the HMHP production.

85 We used 2 folds of the HCHO Henry's law constant as the sensitivity case and conducted  
 86 the simulation of the aqueous HCHO as well as HMS concentrations. We found that  
 87 aqueous HCHO and HMS exhibited slight higher concentrations due to the increased  
 88 solubility of HCHO, with increases of 0.01 and 0.13 µg m<sup>-3</sup> for HCHO and HMS,  
 89 respectively. However, the modeled HCHO and HMS were still exhibited higher  
 90 concentrations during the pollution episodes (EP1 and EP2), which still able to support our  
 91 major conclusions. On the other hand, we compared our modeling aqueous HCHO  
 92 concentrations with previous observations. As shown in the following tables, our modeling  
 93 aqueous HCHO concentrations are comparable and in the same order of magnitude with  
 94 previous observations. Therefore, uncertainties due to the lack of aqueous HCHO  
 95 measurement and the HCHO Henry's law constant approximations would take minor  
 96 impacts on our major conclusions.

102 **Backward trajectory analysis**

103 Hybrid Single-Particle Lagrangian Integrated Trajectory (HYSPLIT) was used to  
104 analyze the air masses before and during the PM<sub>2.5</sub> and O<sub>3</sub> pollution period.  
105 Meteorological data used here were obtained from the Global Data Assimilation System  
106 (GDAS) with a 1°×1° spatial resolution and 3-h temporal resolution. The 72-h backward  
107 trajectories at a height of 100 m obtained from the National Oceanic and Atmospheric  
108 Administration were run every hour. Cluster analysis was performed, and four clusters  
109 were determined based on the total spatial variance (TSV) (Chen et al., 2022; Ji et al.,  
110 2022).

111

112

113

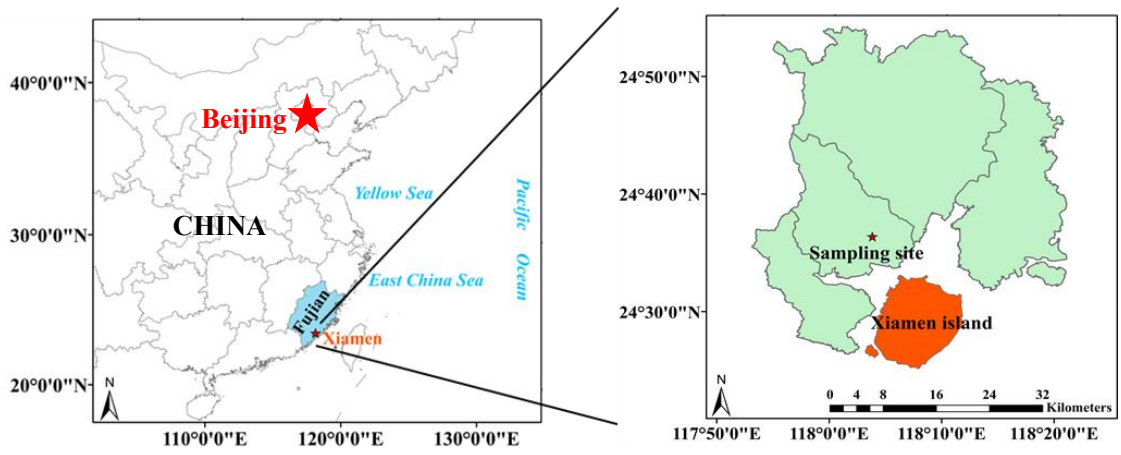

114  
115  
116  
117  
118  
119  
120  
121

**Fig S2. Location of the observation site in a coastal city of Southeast China**

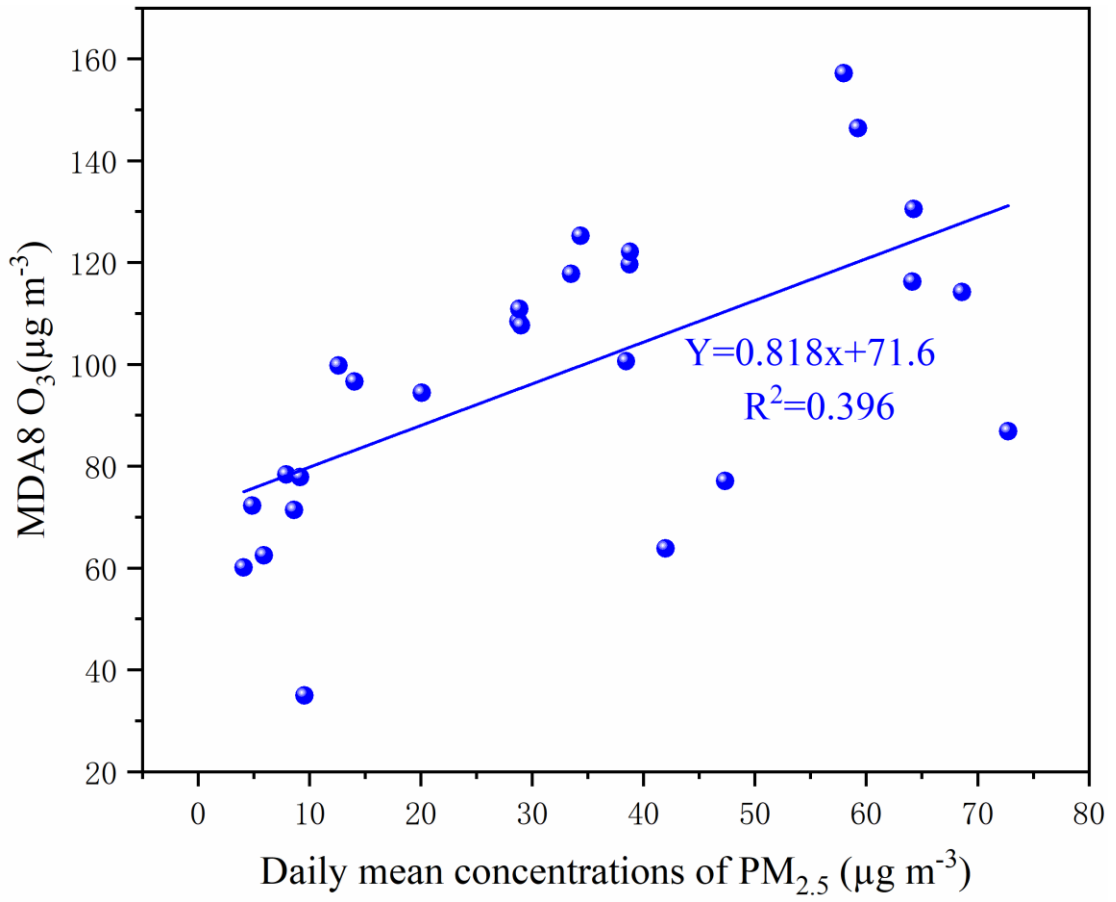

123

124

125

**Fig S3. The correlation of PM<sub>2.5</sub> and MDA8 O<sub>3</sub> concentrations during the whole periods**

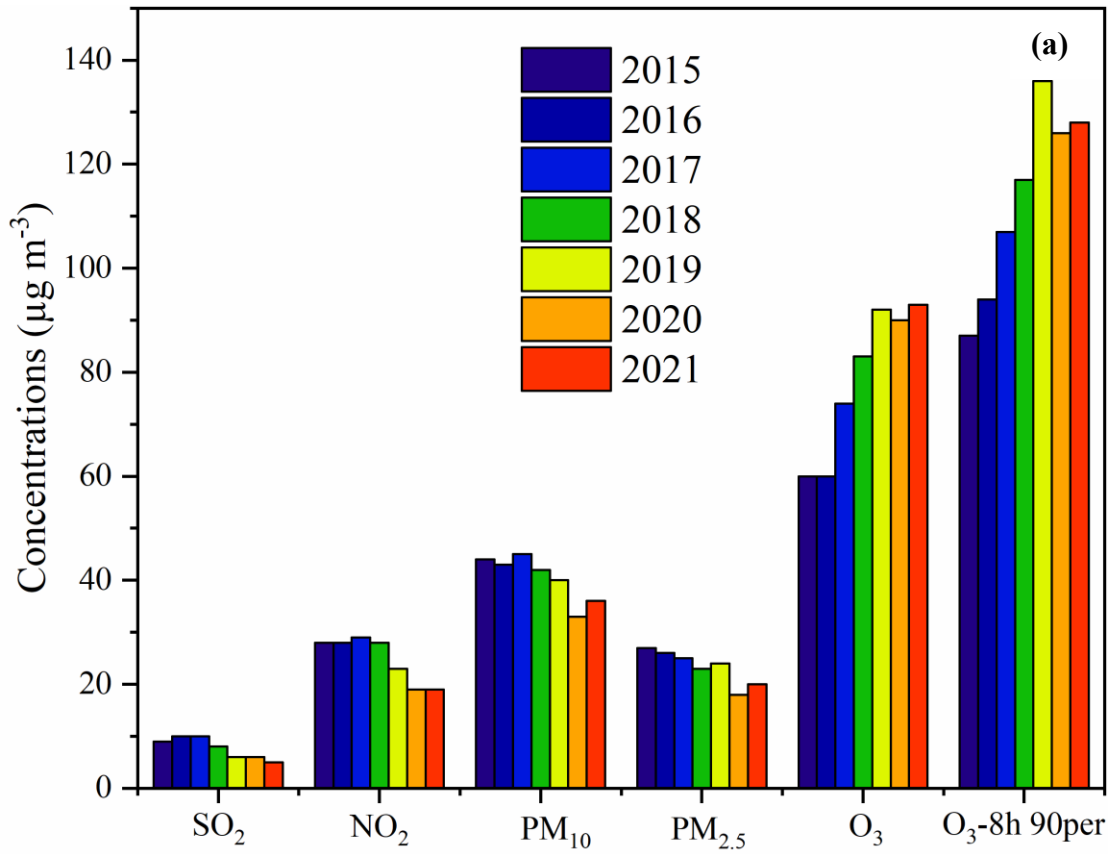

126

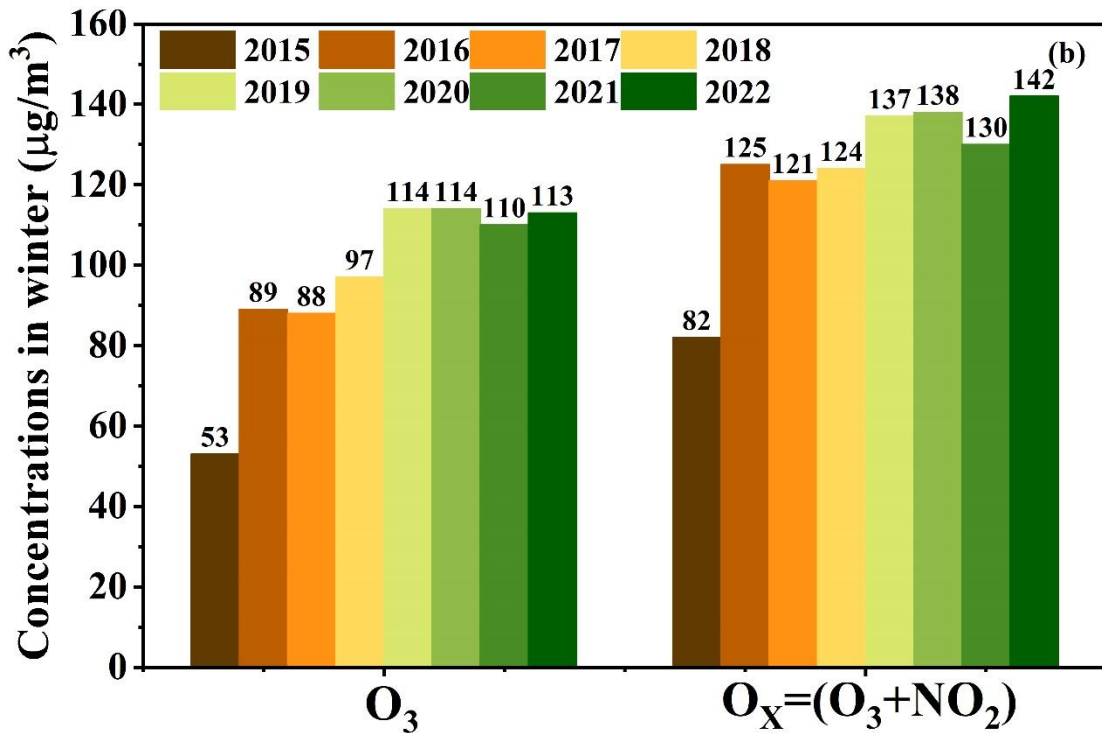

127

128

129

130

131

132

**Fig S4. Inter-annual mean concentrations of criteria air pollutants (a) and averaged concentrations of O<sub>3</sub> and O<sub>x</sub> in winter in Xiamen, a coastal city of Southeast China**

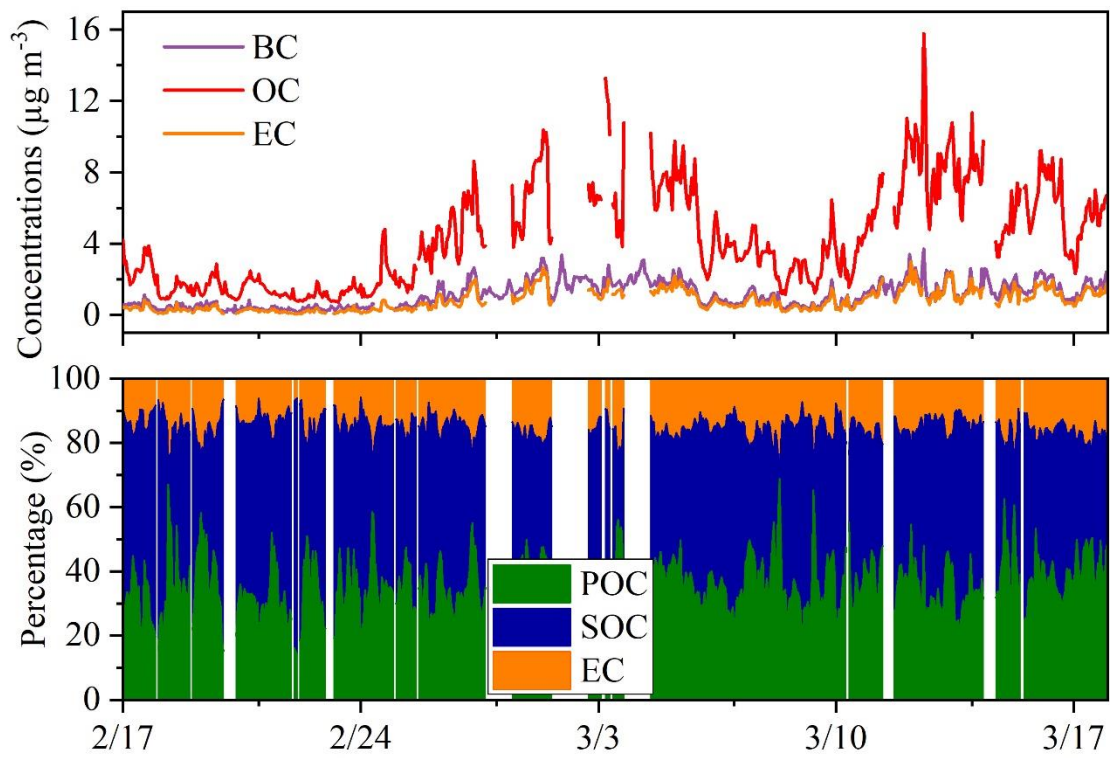

134

135 **Fig S5. The concentrations and percentages of OC, EC, and BC during the whole periods**

136

137

138

139

140



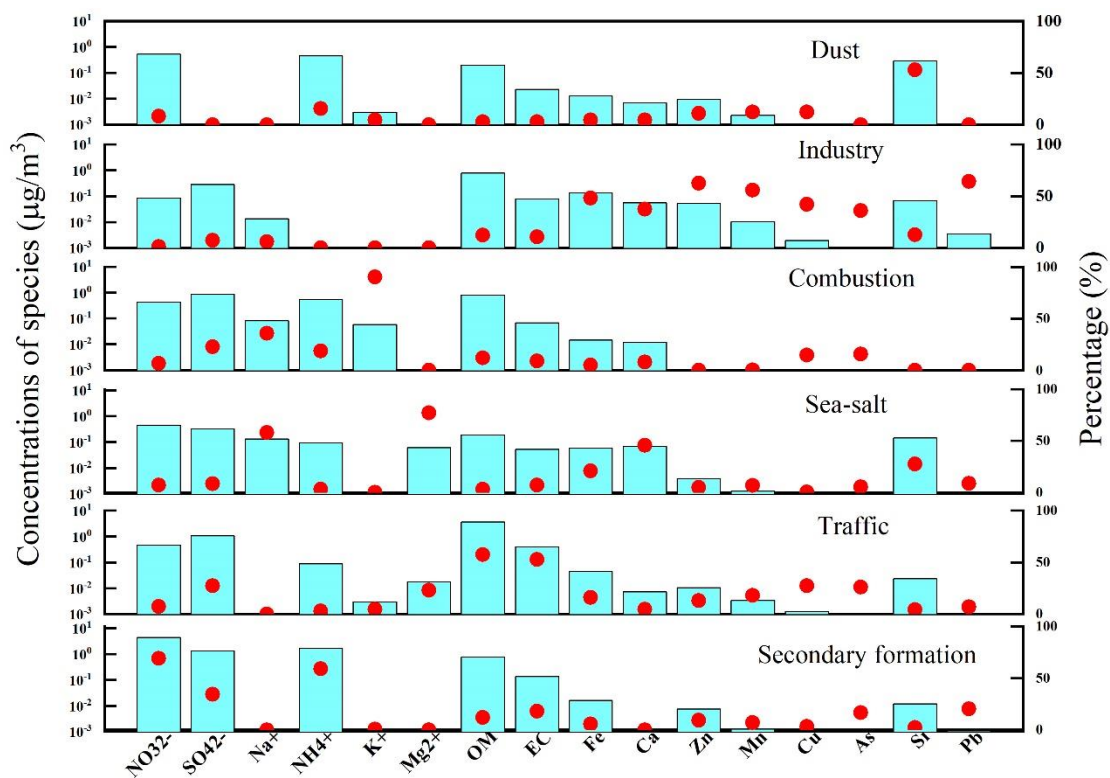

141

142

**Fig S6. The factor profiles and the contribution of various sources to  $\text{PM}_{2.5}$  by the positive matrix factorization (PMF) model analysis. The bars represent the concentrations of various species and the dots represent the contributions of species to the factors.**

145

146

147

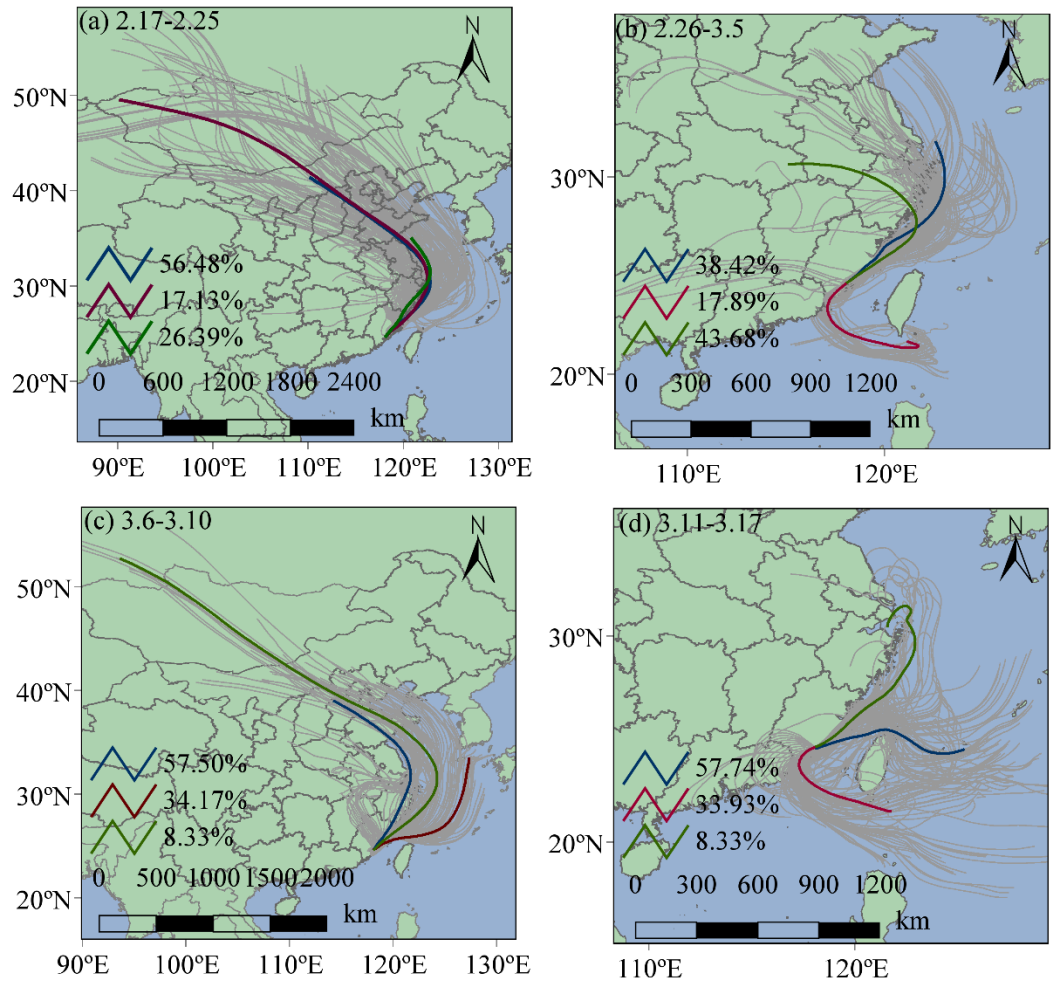

148

149

150

151

152

153

**Fig.S7 Backward trajectory clusters at the monitoring site under different periods**

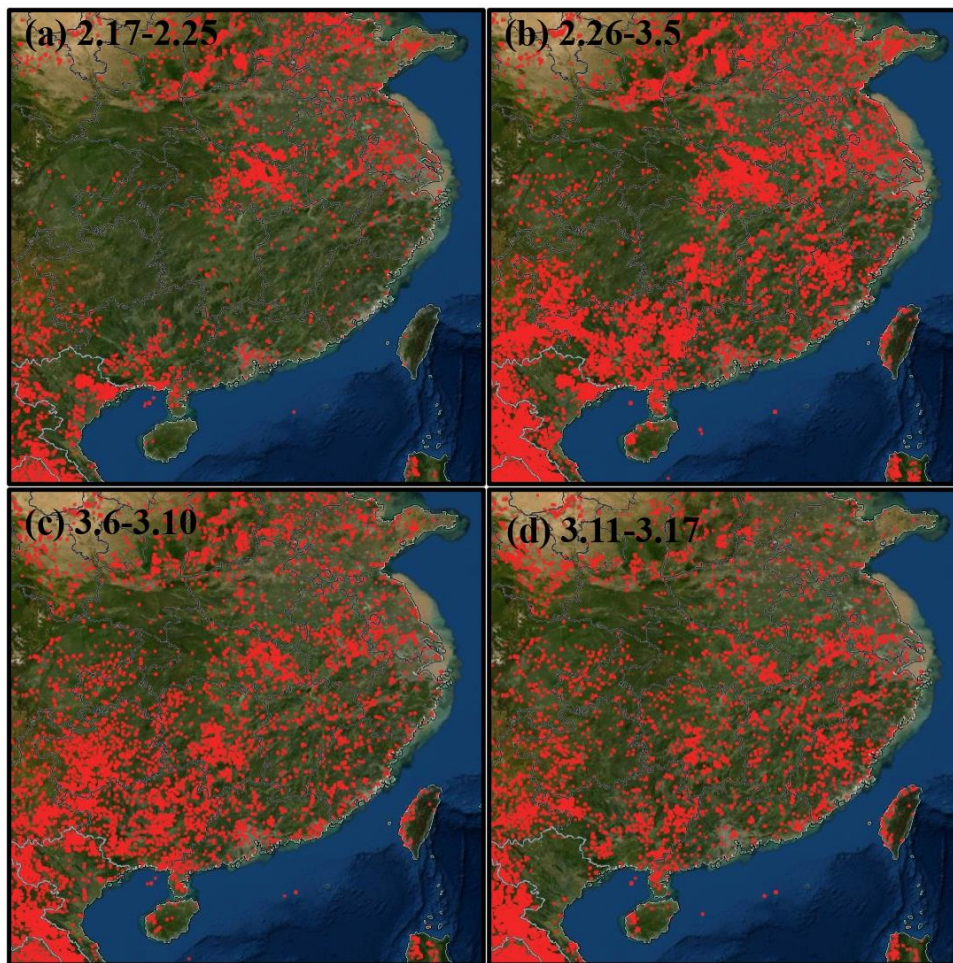

155

156 Fig.S8 The distribution of fire spots around the monitoring site under different periods (From  
157 the Fire Information for Resource Management System,  
158 <https://firms.modaps.eosdis.nasa.gov/firemap/>)

159

160

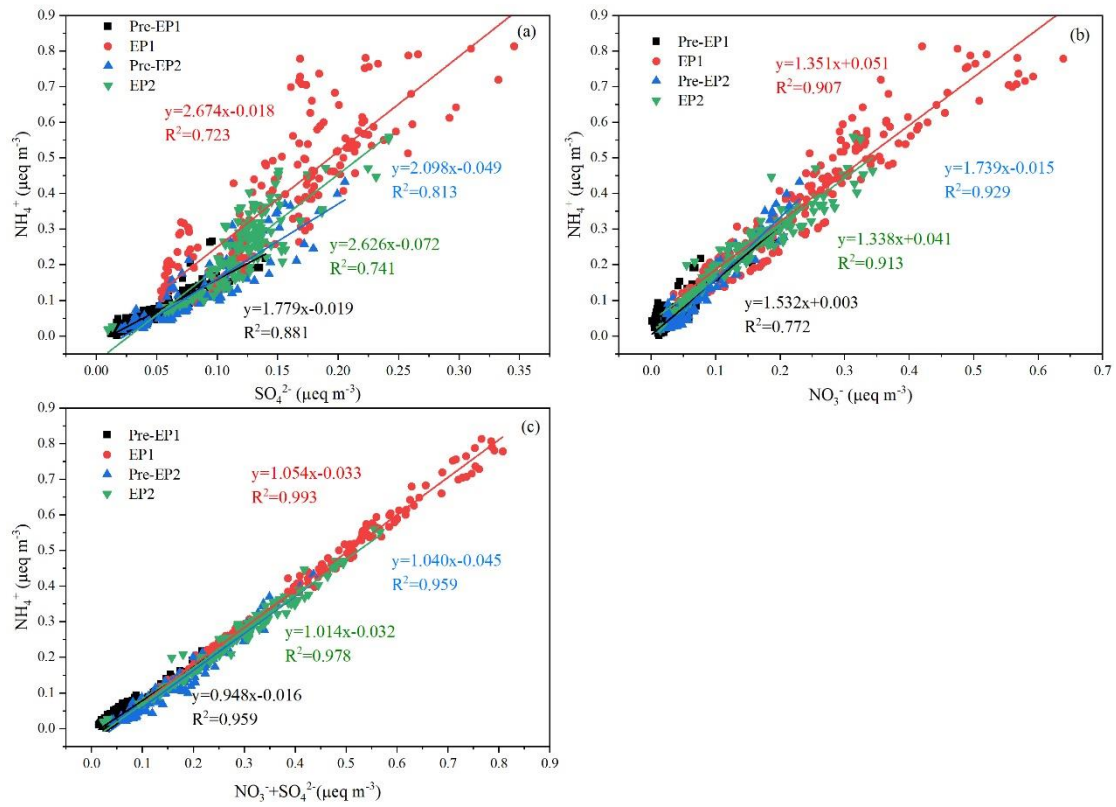

162

163

164

165

**Fig S9.**The correlations between (a)  $\text{NH}_4^+$  and  $\text{SO}_4^{2-}$ , (b)  $\text{NH}_4^+$  and  $\text{NO}_3^-$ , and (c)  $\text{NH}_4^+$  and  $\text{NO}_3^- + \text{SO}_4^{2-}$

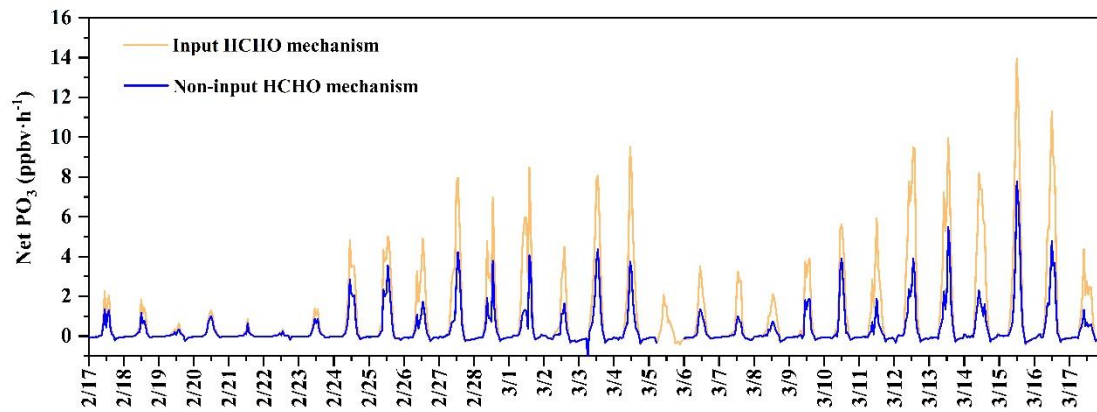

Fig S10. The net O<sub>3</sub> production rates modeled by the OBM with or without HCHO mechanism

167  
168  
169  
170  
171  
172  
173  
174  
175  
176  
177  
178  
179  
180  
181  
182  
183  
184  
185  
186  
187  
188  
189  
190  
191  
192  
193  
194  
195  
196  
197  
198  
199  
200

201  
202

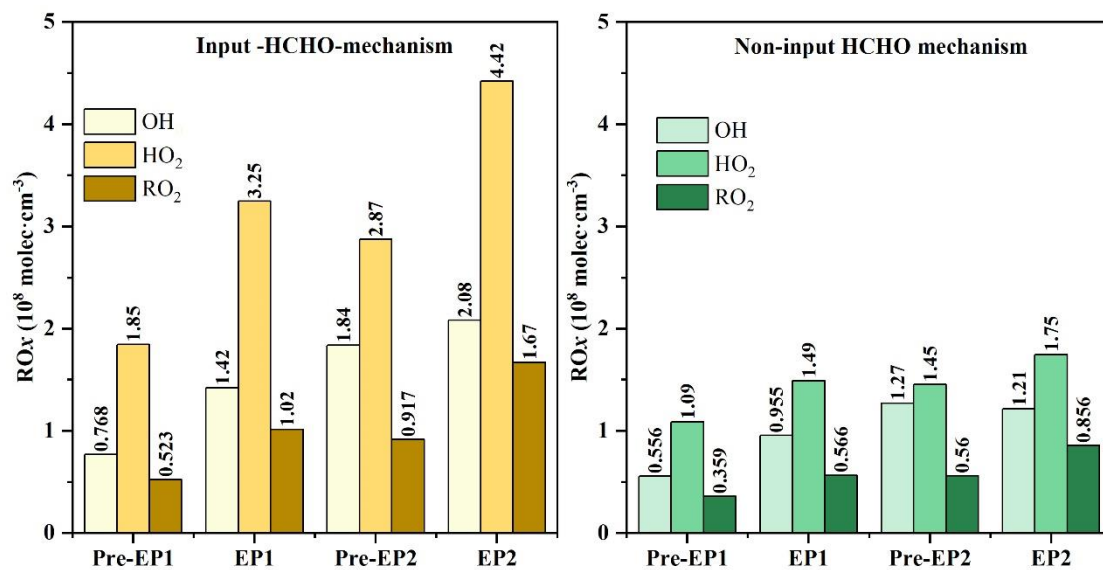

203  
204  
205

Fig S11. The ROx concentrations modeled by the OBM with or without HCHO mechanism

206

207 Table S1 Mean concentrations of air pollutants, chemical compositions and meteorological  
208 parameters under different pollution stages

|                                                        | Pre-EP1      | EP1           | Pre-EP2      | EP2          |
|--------------------------------------------------------|--------------|---------------|--------------|--------------|
| PM <sub>2.5</sub> ( $\mu\text{g m}^{-3}$ )             | 9.03±6.28    | 51.94±19.02   | 33.53±10.41  | 35.34±23.51  |
| PM <sub>10</sub> ( $\mu\text{g m}^{-3}$ )              | 13.68±10.51  | 74.43±24.40   | 57.46±21.11  | 58.21±28.98  |
| O <sub>3</sub> ( $\mu\text{g m}^{-3}$ )                | 60.82±18.57  | 67.12±44.73   | 76.58±31.83  | 58.98±47.97  |
| CO( $\mu\text{g m}^{-3}$ )                             | 531.02±63.18 | 742.86±121.34 | 379.17±95.65 | 577.98±97.24 |
| SO <sub>2</sub> ( $\mu\text{g m}^{-3}$ )               | 9.16±3.47    | 13.74±7.61    | 16.26±2.68   | 18.20±6.58   |
| NO <sub>2</sub> ( $\mu\text{g m}^{-3}$ )               | 12.40±7.00   | 31.38±14.20   | 22.01±10.82  | 32.56±11.08  |
| NO( $\mu\text{g m}^{-3}$ )                             | 1.5±1.31     | 5.56±9.51     | 2.04±14.29   | 6.13±8.02    |
| Ox( $\mu\text{g m}^{-3}$ )                             | 73.22±12.78  | 98.50±29.45   | 88.59±21.32  | 91.54±29.57  |
| BC( $\mu\text{g m}^{-3}$ )                             | 0.45±0.19    | 1.69±0.56     | 0.78±0.32    | 1.61±0.54    |
| OC( $\mu\text{g m}^{-3}$ )                             | 1.69±0.81    | 6.36±2.16     | 3.20±1.52    | 7.48±5.03    |
| EC( $\mu\text{g m}^{-3}$ )                             | 0.27±0.17    | 1.23±0.50     | 0.59±1.51    | 1.29±0.51    |
| SO <sub>4</sub> <sup>2-</sup> ( $\mu\text{g m}^{-3}$ ) | 1.96±1.26    | 7.07±2.91     | 3.87±2.24    | 5.87±1.70    |
| NO <sub>3</sub> <sup>-</sup> ( $\mu\text{g m}^{-3}$ )  | 2.02±1.81    | 14.95±8.34    | 4.83±2.83    | 9.69±4.89    |
| NH <sub>4</sub> <sup>+</sup> ( $\mu\text{g m}^{-3}$ )  | 0.96±0.90    | 6.77±3.43     | 2.16±1.63    | 4.46±1.88    |
| NOR                                                    | 0.16±0.07    | 0.32±0.08     | 0.18±0.06    | 0.24±0.05    |
| SOR                                                    | 0.19±0.07    | 0.38±0.18     | 0.19±0.06    | 0.26±0.08    |
| T(°C)                                                  | 12.38±3.89   | 20.56±3.90    | 18.65±4.17   | 23.93±4.30   |
| RH(%)                                                  | 69.41±12.45  | 63.17±10.32   | 54.30±15.52  | 62.17±11.05  |
| P(kPa)                                                 | 101.14±0.36  | 100.71±0.30   | 100.68±0.15  | 100.17±0.21  |
| WS(m/s)                                                | 1.64±0.70    | 1.02±0.51     | 1.37±0.59    | 0.93±0.54    |
| UV(W/m <sup>2</sup> )                                  | 5.88±9.58    | 9.31±13.94    | 11.08±16.09  | 11.10±15.05  |
| JNO <sub>2</sub> ( $\times 10^{-3} \text{ s}^{-1}$ )   | 1.50±2.45    | 2.49±3.57     | 2.91±3.94    | 2.95±3.79    |
| HONO( $\mu\text{g m}^{-3}$ )                           | 0.75±0.36    | 3.10±2.25     | 1.19±0.58    | 4.19±2.68    |
| HCHO(ppb)                                              | 0.68±0.71    | 2.94±1.01     | 1.59±0.71    | 3.59±1.36    |
| TVOCs(ppb)                                             | 14.47±7.14   | 29.39±11.65   | 14.28±6.18   | 29.91±12.05  |
| Aromatics(ppb)                                         | 1.29±1.36    | 3.21±1.92     | 1.54±1.29    | 3.06±1.87    |

|                      |           |            |           |            |
|----------------------|-----------|------------|-----------|------------|
| Alkynes(ppb)         | 0.78±0.41 | 1.04±1.00  | 0.12±0.06 | 0.77±0.72  |
| Alkanes(ppb)         | 6.48±2.06 | 10.27±5.07 | 4.46±1.92 | 9.73±4.46  |
| Alkenes(ppb)         | 0.75±0.52 | 1.28±0.84  | 0.49±0.42 | 1.37±1.09  |
| OVOCs(ppb)           | 0.87±0.35 | 1.21±0.23  | 1.01±0.41 | 1.22±0.25  |
| Halohydrocarbon(ppb) | 4.30±3.69 | 12.40±4.77 | 6.65±3.03 | 13.76±5.76 |

---

209

210

211

212

213



214

215

Table S2 Comparisons of atmospheric HCHO in China

| Location         | Type     | Seasons       | Mean( $\pm$ SD)<br>(ppbv) | Range<br>(ppbv)   | Reference  |
|------------------|----------|---------------|---------------------------|-------------------|------------|
| Xiamen, China    | Urban    | Spring        | 2.9 $\pm$ 0.3             | 0.25-8.34         | [12]       |
|                  | Urban    | Autumn        | 3.2 $\pm$ 1.4             | 0.38-7.56         | [12]       |
|                  | Urban    | Winter        | 1.95 $\pm$ 1.06           | 0.23-6.22         | This study |
| Shenzhen, China  | Urban    | Spring        | 3.4 $\pm$ 1.6             | N.A. <sup>a</sup> | [2]        |
| Hong Kong, China | Urban    | Spring (2012) | 3.02 $\pm$ 0.91           | N.A.              | [6]        |
| Shanghai, China  | Suburban | Spring (2018) | 6.7 $\pm$ 3.6             | N.A.-20.9         | [4]        |
| Shanghai, China  | Suburban | Spring (2018) | 5.01 $\pm$ 3.80           | N.A.-18.69        | [10]       |
| Beijing, China   | Urban    | Summer (2013) | 11.39 $\pm$ 5.58          | N.A.              | [5]        |
| Shanghai, China  | Urban    | Summer (2018) | 3.31 $\pm$ 1.43           | N.A.              | [8]        |
| Shenzhen, China  | Urban    | Summer        | 5.0 $\pm$ 4.4             | N.A.              | [2]        |
| Hong Kong, China | Urban    | Summer (2011) | 8.07 $\pm$ 1.94           | N.A.              | [6]        |
| Guangzhou, China | Urban    | Summer (2010) | 6.69 $\pm$ 1.98           | N.A.              | [3]        |
| Yantai, China    | Urban    | Summer        | 3.90 $\pm$ 1.12           | N.A.              | [3]        |
| Beijing, China   | Suburban | Summer        | 11.17 $\pm$ 5.32          | 3.14-35.08        | [9]        |
| Shanghai, China  | Suburban | Summer        | 2.2 $\pm$ 1.8             | N.A.-9.4          | [7]        |
| Wuhan, China     | Suburban | Summer        | 2.1 $\pm$ 0.2             | 0.6-4.1           | [1]        |
| Hong Kong, China | Urban    | Autumn (2011) | 2.96 $\pm$ 0.70           | N.A.              | [6]        |
| Guangdong, China | Urban    | Autumn        | 4.12 $\pm$ 1.02           | 2.56-7.31         | [11]       |
| Beijing, China   | Urban    | Winter (2013) | 7.39 $\pm$ 5.26           | N.A.              | [5]        |
| Shenzhen, China  | Urban    | Winter        | 4.2 $\pm$ 2.2             | N.A.              | [2]        |
| Hong Kong, China | Urban    | Winter (2012) | 2.70 $\pm$ 1.20           | N.A.              | [6]        |
| Guangzhou, China | Urban    | Winter        | 3.35 $\pm$ 1.38           | N.A.              | [3]        |

216 Note: (a) N.A. means no relevant data available.

217

218

219

220 Table S3. The detection limits, time resolutions and measured uncertainties of air  
221 pollutants

| Species         | Measurement Techniques                                     | Uncertainties | Detection limits | Time resolution |
|-----------------|------------------------------------------------------------|---------------|------------------|-----------------|
| HCHO            | FMS-100, Focused Photonics Inc., Hangzhou, China           | ≤5%           | 50 pptv          | 1 s             |
| PAN             | PANs-1000, Focused Photonics Inc., Hangzhou, China         | ±10%          | 50 pptv          | 5 min           |
| O <sub>3</sub>  | Model 49i, Thermo Fischer Scientific, USA                  | ±5%           | 1 ppbv           | 1 h             |
| NO <sub>x</sub> | Model 42i, Thermo Fischer Scientific, USA                  | ±10%          | 0.5 ppbv         | 1 h             |
| CO              | Model 48i, Thermo Fischer Scientific, USA                  | ±5%           | 40 ppbv          | 1 h             |
| SO <sub>2</sub> | Model 43i, Thermo Fischer Scientific, USA                  | ±10%          | 0.5 ppbv         | 1 h             |
| VOCs            | GC-FID/MS, TH-300B, Wuhan, China                           | ±10%          | 20-300 pptv      | 1 h             |
| HONO            | MARGA, ADI 2080, Applikon Analytical B.V., the Netherlands | ±20%          | 50 pptv          | 1 h             |

222

223

224

225

226

227

228

229

230

231

232

233

234

235

236

237

238

239

240

241

242

243

244

245

246

247

248

249  
250  
251  
252  
253  
254  
255  
256  
257  
258  
259  
260  
261  
262  
263  
264  
265  
266  
267  
268  
269  
270  
271  
272  
273  
274  
275  
276  
277  
278  
279  
280  
281  
282  
283  
284  
285  
286  
287

## Reference

- [1]Zeng P, Lyu X, Guo H, et al. Spatial variation of sources and photochemistry of formaldehyde in Wuhan, Central China[J]. Atmospheric Environment, 2019, 214: 116826.
- [2]Wang C, Huang X, Han Y, et al. Sources and Potential Photochemical Roles of Formaldehyde in an Urban Atmosphere in South China[J]. Journal of Geophysical Research: Atmospheres, 2017, 122(21): 11,934-11,947.
- [3]Ho K F, Ho S S H, Huang R J, et al. Spatiotemporal distribution of carbonyl compounds in China[J]. Environmental Pollution, 2015, 197: 316-324.
- [4]Zhang K. Formation mechanism of HCHO pollution in the suburban Yangtze River Delta region, China: A box model study and policy implementations[J]. Atmospheric Environment, 2021, 267: 118755.
- [5]Rao Z, Chen Z, Liang H, et al. Carbonyl compounds over urban Beijing: Concentrations on haze and non-haze days and effects on radical chemistry[J]. Atmospheric Environment, 2016, 124: 207-216.
- [6]Cheng Y, Lee S C, Huang Y, et al. Diurnal and seasonal trends of carbonyl compounds in roadside, urban, and suburban environment of Hong Kong[J]. Atmospheric Environment, 2014, 89: 43-51.
- [7]Wu Y, Huo J, Yang G, et al. Measurement report: Production and loss of atmospheric formaldehyde at a suburban site of Shanghai in summertime[J]. Atmospheric Chemistry and Physics, 2022, 23: 2997-3014.
- [8]Guo Y, Wang S, Zhu J, et al. Atmospheric formaldehyde, glyoxal and their relations to ozone pollution under low- and high-NO<sub>x</sub> regimes in summertime Shanghai, China[J]. Atmospheric Research, 2021, 258: 105635.
- [9]Yang X, Xue L, Wang T, et al. Observations and Explicit Modeling of Summertime Carbonyl Formation in Beijing: Identification of Key Precursor Species and Their Impact on Atmospheric Oxidation Chemistry[J]. Journal of Geophysical Research: Atmospheres, 2018, 123(2): 1426-1440.
- [10]Zhang K, Huang L, Li Q, et al. Explicit modeling of isoprene chemical processing in polluted air masses in suburban areas of the Yangtze River Delta region: radical cycling and formation of ozone and formaldehyde[J]. Atmospheric Chemistry and Physics, 2021, 21(8): 5905-5917
- [11]Shen H, Liu Y, Zhao M, et al. Significance of carbonyl compounds to photochemical ozone formation in a coastal city (Shantou) in eastern China[J]. Science of The Total Environment, 2021, 764: 144031.
- [12]Liu, T., Lin, Y., Chen, J.\*, Chen, G., Yang, C., Xu, L., Li, M., Fan, X., Zhang, F., and Hong, Y.\* Pollution mechanisms and photochemical effects of atmospheric HCHO in a coastal city of southeast China. Science of the Total Environment. 2023, 859:160210
